# Supplementary material for: Impact of Short-Term Parental Nutrition Education on the Performance and Body Composition of Young Basketball Players: A Pre-Post Intervention Study
Source: Research Square preprint supplement (doi:10.21203/rs.3.rs-8403932/v1), 2026-01-21
Supplement: Supplementary file 1 [file 00b5bf4a2496278178f553e7.docx]

**Supplementary file 3.** Gender differences in food consumption records of young players before and after the short-term parental nutrition education program

|  | **Girl** | | | **Boy** | | |
| --- | --- | --- | --- | --- | --- | --- |
| **Before education** | **After education** | **p** | **Before education** | **After education** | **p** |
| **x̄ ± SD** | **x̄ ± SD** | **x̄ ± SD** | **x̄ ± SD** |
| Energy (kcal/d) | 1199.3 **±** 140.1 | 1609.7 ± 356.1 | **0.001** | 1524.5 ± 406.4 | 1651.1 ± 366.6 | **0.003** |
| Carbohydrate (g/day) | 129.0 ± 34.0 | 213.6 ± 60.3 | **0.001** | 179.3 ± 62.9 | 209.9 ± 61.4 | **0.001** |
| Carbohydrate (%) | 43.6 ± 11.6 | 52.9 ± 6.1 | **0.001** | 46.4 ± 6.9 | 50.3 ± 6.4 | **< 0.001** |
| Protein (g/day) | 42.3 ± 7.6 | 60.2 ± 20.1 | **0.003** | 59.5 ± 17.8 | 65.9 ± 12.4 | **0.001** |
| Protein (%) | 14.1 ± 2.3 | 14.9 ± 3.3 | **0.038** | 15.7 ± 2.8 | 16.2 ± 2.2 | **0.012** |
| Protein (g/kg/day) | 1.0 ± 0.4 | 1.5 ± 0.5 | **0.011** | 1.6 ± 0.6 | 1.7 ± 0.5 | **0.007** |
| Fat (g/day) | 50.9 ± 10.9 | 55.1 ± 14.1 | **0.016** | 61.3 ± 15.7 | 58.4 ± 14.6 | **0.006** |
| Fat (%) | 38.1 ± 6.8 | 31.0 ± 5.1 | **0.001** | 36.8 ± 6.3 | 32.1 ± 5.6 | **< 0.001** |
| Dietary fiber (g/day) | 13.8 ± 4.0 | 17.9 ± 6.1 | **0.004** | 13.6 ± 5.3 | 17.7 ± 5.3 | **< 0.001** |
| Water (mL) | 1357.0 ± 496.9 | 1840.0 ± 476.0 | **0.001** | 1284.0 ± 579.6 | 1652.5 ± 380.6 | **< 0.001** |

* Values are presented as mean ± standard deviation. Within-group differences were assessed using the Wilcoxon signed-rank test.
