# Supplementary material for: Impact of Short-Term Parental Nutrition Education on the Performance and Body Composition of Young Basketball Players: A Pre-Post Intervention Study
Source: Research Square preprint supplement (doi:10.21203/rs.3.rs-8403932/v1), 2026-01-21
Supplement: Supplementary file 2 [file 55ab7b1e0aeed5d282c4c510.docx]

**Supplementary file 2.** Gender differences in performance test scores of young players before and after the short-term parental nutrition education program

|  | **Girl** | | | **Boy** | | |
| --- | --- | --- | --- | --- | --- | --- |
| **Before education** | **After education** | **p** | **Before education** | **After education** | **p** |
| **x̄ ± SD** | **x̄ ± SD** | **x̄ ± SD** | **x̄ ± SD** |
| Flexibility (cm) | 32. 2 ± 6.0 | 35.9 ± 5.2 | **0.001** | 23.4 ± 8.5 | 26.4 ± 9.2 | **< 0.001** |
| Balance (sec) | 7.5 ± 4.2 | 10.8 ± 4.8 | **0.002** | 10.3 ± 5.3 | 13.0 ± 5.3 | **< 0.001** |
| Right hand-claw strength (kg) | 17.7 ± 6.1 | 20.7 ± 6.2 | **0.001** | 16.1 ±5.6 | 18.5 ± 6.1 | **< 0.001** |
| Left hand-claw strength (kg) | 17.2 ± 5.8 | 20.0 ± 6.0 | **0.001** | 14.3 ± 5.3 | 16.8 ± 6.2 | **< 0.001** |
| Reaction (cm) | 15.8 ± 10.2 | 13.2 ± 8.1 | **0.004** | 16.3 ± 10.1 | 14.3 ± 6.4 | **0.002** |
| T test (sec) | 14.4 ± 1.6 | 12.4 ± 1.7 | **0.001** | 16.3 ± 2.4 | 14.7 ± 2.2 | **< 0.001** |
| Push-ups (number) | 18.7 ± 8.6 | 22.0 ±9.1 | **0.001** | 15.2 ± 6.9 | 19.5 ± 8.0 | **< 0.001** |
| Sit-ups (number) | 15.5 ± 3.3 | 20.9 ± 4.5 | **0.001** | 14.4 ± 4.7 | 20.1 ± 6.2 | **< 0.001** |
| Ten meters speed (sec) | 2.5 ± 0.2 | 2.3 ± 0.1 | **0.001** | 3.2 ± 2.0 | 3.0 ± 1.9 | **< 0.001** |
| Vertical jump (cm) | 26.5 ± 4.9 | 30.9 ± 4.6 | **0.001** | 23.8 ± 7.0 | 28.4 ± 7.6 | **< 0.001** |
| Standing long jump (cm) | 133.1 ± 21.9 | 145.0 ± 19.2 | **0.001** | 124.1 ± 23.1 | 138.2 ± 23.1 | **< 0.001** |

* Values are presented as mean ± standard deviation. Within-group differences were assessed using the Wilcoxon signed-rank test.
