# Supplementary material for: Impact of Short-Term Parental Nutrition Education on the Performance and Body Composition of Young Basketball Players: A Pre-Post Intervention Study
Source: Research Square preprint supplement (doi:10.21203/rs.3.rs-8403932/v1), 2026-01-21
Supplement: Supplementary file 3 [file 859e450e1f76f8d636461d2f.docx]

**Supplementary file 1.** Gender differences in anthropometric measurements of young players before and after the short-term parental nutrition education program

|  | **Girl** | | | **Boy** | | |
| --- | --- | --- | --- | --- | --- | --- |
| **Before education** | **After education** | **p** | **Before education** | **After education** | **p** |
| **x̄ ± SD** | **x̄ ± SD** | **x̄ ± SD** | **x̄ ± SD** |
| Body weight (kg) | 40.8 ± 12.5 | 41.9 ± 12.1 | **0.016** | 39.9 ± 12.9 | 41.2 ± 12.3 | **< 0.001** |
| Height (cm) | 147.1 ± 12.1 | 150.3 ± 11.7 | **0.011** | 144.8 ± 10.4 | 149.4 ± 10.5 | **< 0.001** |
| BMI (kg/m2) | 18.5 ± 3.4 | 18.1 ± 3.1 | **0.019** | 18.6 ± 4.0 | 18.1 ± 3.6 | **0.002** |
| Waist (cm) | 70.7 ± 9.6 | 67.6 ± 7.8 | **0.004** | 70.4 ± 11.5 | 69.3 ± 9.8 | **0.005** |
| Hip (cm) | 83.3 ± 9.5 | 83.1 ± 7.3 | **0.016** | 81.3 ± 10.5 | 80.9 ± 9.7 | **0.011** |
| Body fat (%) | 9.7 ± 4.7 | 9.2 ± 4.3 | **0.021** | 9.5 ± 6.8 | 8.7 ± 5.3 | **0.002** |
| Lean body mass (kg) | 31.1 ± 8.2 | 32.7 ± 8.2 | **0.001** | 30.4 ± 7.3 | 32.5 ± 8.0 | **< 0.001** |
| Body fluid (%) | 22.4 ± 5.8 | 24.1 ± 6.2 | **0.001** | 21.6 ± 5.1 | 23.5 ± 6.1 | **< 0.001** |
| BMR (kcal) | 1298.0 ± 211.9 | 1342.2 ± 201.8 | **0.001** | 1269.6 ± 179.2 | 1303.2 ± 169.2 | **< 0.001** |

* Values are presented as mean ± standard deviation. Within-group differences were assessed using the Wilcoxon signed-rank test. **BMI:** Body Mass Index; **BMR:** Basal Metabolic Rate
