# Supplementary material for: Impact of Short-Term Parental Nutrition Education on the Performance and Body Composition of Young Basketball Players: A Pre-Post Intervention Study
Source: Research Square preprint supplement (doi:10.21203/rs.3.rs-8403932/v1), 2026-01-21
Supplement: Supplementary file 4 [file d1cbc06b6daa102e83834683.docx]

**Questionnaire form**

**Impact of Short-Term Parental Nutrition Education on the Performance and Body Composition of Young Basketball Players**

**1. Socio-demographic data**

**1-** **What is your child's age?**

**2-** **What is the gender of your child?**  G  B

**3-** **What is your child's educational status?**

a) Primary school b) Middle school

**4- How many people live with you in your home/dormitory? ………people**

**5- Who provides for the family?**

a) Mother b) Father c) Mother and father together d) Relative

**6- What is the profession of the parents in the family?**

Mother’s profession…………………… Father’s profession………………………..

**7- Does your child have a health problem diagnosed by a doctor?**

Yes (If yes, what is it?..................................) b) No

**8- Does your child use medication regularly and/or continuously?**

a) Yes (If yes, what is it?..................................) b) No

**9- How many years has your child been involved in basketball? …………………..**

**10- How many days and hours a week does your child do sports? …………day/week…………hour/day**

**Anthropometric Measurements**

| **Height, cm** |  |
| --- | --- |
| **Weight, kg** |  |
| **BMI, kg/m2** |  |
| **Waist circumference, cm** |  |
| **Hip circumference, cm** |  |
| **Waist/Hip ratio** |  |
| **Body fat %** |  |
| **Body muscle %** |  |
| **Lean body mass, kg** |  |
| **BMR, kcal** |  |

**Eating Habits**

**1. How many meals does your child eat a day? ……….Main meal ………Snack**

**2. Does your child skip meals? (If your answer is no, skip questions 3 and 4.)**

a) Yes b) No

**3. If she/he skips meals, which meal does he skip?**

a) Breakfast b) Lunch c) Dinner d) Snack

**4. If she/he skips meals, why?**

a) To lose weight b) Because she/he forgot/couldn't find the opportunity

c) Because she/he wasn't hungry d) Because it was a habit e) Other:………………

**5. How often does your child eat out? (e.g. once a week) ………………..**

**6. How many hours before training or competition does your child have a main meal?**

a) Half an hour b) 1 hour c) 2 hours d) 3-4 hours e) Other:…………………..

**7. What does your child eat for their main meal before training or competition?**

a. She/He doesn't pay attention; he eats whatever he can find.

b. She/He eats mostly protein (meat, milk, yogurt, cheese, etc.)

c. She/He eats mostly carbohydrates (bread, rice, pasta, pastries, etc.)

d. She/He eats mostly fats (fried foods, etc.)

e. She/He eats mostly protein and carbohydrates.

f. She/He consumes sugary foods (sherbet desserts, cake, chocolate, etc.)

g. Other:……………………………………………………….

**8. How many hours after training or competition does she/he have a main meal?**

a) After half an hour b) After 1 hour c) After 2 hours d) After 3-4 hours

**9. What does your child consume after training or competition? (You can select several options together.)**

a. She/He doesn't pay attention; he eats whatever he can find.

b. She/He eats mostly protein (meat, milk, yogurt, cheese, etc.)

c. She/He eats mostly carbohydrates (bread, rice, pasta, pastries, etc.)

d. She/He eats mostly fats (fried foods, etc.)

e. She/He eats mostly protein and carbohydrates.

f. She/He consumes sugary foods (sherbet desserts, cake, chocolate, etc.)

g. Other:……………………………………………………….

**10. How much fluid does your child consume daily?**

a) Water:………mL/day b) Sport drink:…..… . mL/day c) Other:………

**11. How much fluid should be consumed on training or competition days?**

a) Water:………mL/day b) Sport drink:…..… . mL/day c) Other:………

**12. Does your child take nutritional supplements? (multivitamin, multimineral, etc.)**

a) Sometimes b) Often c) Always d) No

**13. If taking a nutritional supplement, what is its name and brand?**.....................................................................

**14. If taking a nutritional supplement, please indicate the dosage and amount used. ………………………………**

**15. If taking a nutritional supplement, please indicate how long you have been using it.…………………………………**

**16. Why does your child take nutritional supplements?**

a) To improve performance. b) To prevent illness.

c) To supplement a diet. d) To feel better.

e) To get more energy. f) Due to expert advice.

g) Other:……………………………………………………….

**17. Do you believe that your nutritional knowledge is sufficient?**

a) Yes b) No c) Partially

**18. From whom or where did you learn your nutritional inf knowledge?**

a) Seminar/course b) From books, newspapers, and magazines

c) Friend/family d) Dietitian

e) TV, internet, etc. f) Trainer g) Other………….

**4. Sport Nutrition Knowledge Level Scale**

**1. Which of the following nutrients is the primary energy source for athletes?**

A. Carbohydrate B. Protein C. Fat D. Vitamin

**2- Which of the following vitamins is dangerous if taken in excess?**

A. Thiamine B. Vitamin B6 C. Vitamin A D. Vitamin C

**3- Which nutrient is most important to an athlete's performance?**

A. Iron B. Zinc C. Magnesium D. Vitamin C

**4- Which of the following is the healthiest low-fat choice when eating dinner at a fast-food restaurant?**

A. Fried chicken sandwich B. Green salad with ranch dressing and cheese

C. Grilled chicken sandwich D. Medium fries

**5- Which of the following is the best meal time to replace glycogen (muscle carbohydrate stores) after training?**

A. Immediately after training B. When hungry

C. 1-3 hours after training D. 4 hours after training

**6- Which of the following is not a physiological effect of caffeine?**

A. Decreases metabolic rate. B. Stimulates the central nervous system.

C. Increases the secretion of epinephrine. D. Increases heart rate and force of contraction.

**7- Which of the following should be included in the nutritional choices of endurance athletes during the recovery period?**

A. Carbohydrate-rich foods B. Foods containing both carbohydrates and protein

C. Fat-rich foods D. Protein-rich foods

**8- What did an athlete do wrong when she/he consumed 360-480 grams of fatty beef, baked potatoes with butter, green beans and soda before the competition?**

A. The sugar in soda can take up to three hours to digest.

B. High-fat meals take longer to digest and hinder performance.

C. None: The pre-workout meal should be at least 500 kcal or more.

D. None: Athletes should consume foods they feel comfortable with.

**9- According to recent studies, creatine use can increase physical performance in which of the following sports?**

A.High-intensity anaerobic training (e.g., weightlifting)

B. Cross-country events lasting approximately 30 minutes

C. Marathon running (42 kilometers)

D. Ultra-marathons ('Iron Man'-type triathlons)

**10- Which of the following is a false statement regarding ergogenic aids (various methods, tools or substances used by athletes to increase performance)?**

A. All ergogenic aids are illegal and are grounds for disqualification.

B. While ergogenic aids are safe, some may pose health risks.

C. The endorsement or advertising of ergogenic aids by professional athletes does not imply their effectiveness.

D. Ergogenic aids may contain prohibited drugs.

**11- What do the guidelines recommend for healthy and safe weight loss?**

A. 1.5-2 kg per week B. 0.5-1 kg per week C. 4-6 kg per week D. 7 kg per month

**12- Which of the following side effects would be expected from long-term laxative use in an athlete diagnosed with bulimia (eating disorder) and who has used laxatives (diarrhea-inducing) in the past?**

A. Electrolyte imbalance and dehydration B. Hyperactivity

C. Vomiting blood D. Chronic nasal congestion

**13- Which of the following should be increased in amount to safely increase muscle mass?**

A. Fat intake, carbohydrate intake B. Resistance exercise, energy intake

C. Resistance exercise, protein intake D. Protein, water consumption

**14- The female athlete triad is the combination of which of the following?**

A. Low energy availability, menstrual cycle dysfunction, osteoporosis

B. Depression, premenstrual syndrome, and osteoporosis

C. Menstrual cramps, inadequate nutritional intake, decreased iron levels

D. Eating behavior disorders, loss of menstrual cycle, and osteoporosis

**15- Which of the following is not a method for measuring body composition (especially body fat percentage)?**

A. Body mass index (BMI) B. Underwater hydrostatic weighing

C. Bioelectrical impedance analysis (BIA) D. Skinfold thickness measurement

**16- Which of the following is not one of the mechanisms that allow the body to adapt to heat after 3 weeks of training in hot weather?**

A. Increased sweating during exercise

B. Sudden drop in blood pressure in response to exercise

C. Decrease in heart rate in response to exercise

D. Increased sodium loss per liter of sweat lost

**17- Which of the following methods is the best way to determine the amount of fluid lost through sweat for an athlete who does not go to the bathroom or drink water during training?**

A. Monitoring urine color B. Pre- and post-workout weighing

C. Thirst D. Urinary frequency

**18- Excessive water consumption and inadequate salt intake during long-term training in hot weather can lead to which of the following life-threatening health problems?**

A. Hypertension (high blood pressure) B. Dehydration (fluid loss)

C. Hyponatremia (water intoxication) D. Hypernatremia (high potassium)

**19- If an athlete loses 450-500 mL of fluid during training, how many milliliters is the recommended fluid intake after training?**

A. 480-720 mL B. 210-300 mL C. 720-1080 mL D. 180-240 mL

**20- Significant electrolyte (sodium, potassium, chloride, and magnesium) losses that occur during heavy training can lead to which of the following symptoms?**

A. Drop in blood pressure, increased urine production

B. Stress fractures, sweating

C. Shortness of breath (difficult or labored breathing), indigestion

D. Muscle cramps, heat stroke

**4. Food Consumption Record Form (1. Day-** **Weekdays)**

| **Meals** | **Food Name** | **Amount** | **Water amount** |
| --- | --- | --- | --- |
| **Breakfast**  **Time:** |  |  |  |
| **Snack 1**  **Time:** |  |  |  |
| **Lunch**  **Time:** |  |  |  |
| **Snack 2**  **Time:** |  |  |  |
| **Dinner**  **Time:** |  |  |  |
| **Snack 3**  **Time:** |  |  |  |

**4. Food Consumption Record Form (2. Day-** **Weekdays)**

| **Meals** | **Food Name** | **Amount** | **Water amount** |
| --- | --- | --- | --- |
| **Breakfast**  **Time:** |  |  |  |
| **Snack 1**  **Time:** |  |  |  |
| **Lunch**  **Time:** |  |  |  |
| **Snack 2**  **Time:** |  |  |  |
| **Dinner**  **Time:** |  |  |  |
| **Snack 3**  **Time:** |  |  |  |

**4. Food Consumption Record Form (3. Day-** **Weekends)**

| **Meals** | **Food Name** | **Amount** | **Water amount** |
| --- | --- | --- | --- |
| **Breakfast**  **Time:** |  |  |  |
| **Snack 1**  **Time:** |  |  |  |
| **Lunch**  **Time:** |  |  |  |
| **Snack 2**  **Time:** |  |  |  |
| **Dinner**  **Time:** |  |  |  |
| **Snack 3**  **Time:** |  |  |  |
